1 **The Influence of Pregnancy on PrEP uptake and Adherence Amongst HIV-Negative High-**  
2 **Risk Young Women in Kampala, Uganda: A Qualitative Assessment**

3

4 **Authors:**

5 Shivali Joshi<sup>1</sup>, Catherine Namuddu<sup>2</sup>, Francis Xavier Kasujja<sup>2</sup>, Miriam Mirembe<sup>2</sup>, Jaco Homsy<sup>1</sup>,  
6 Janet Seeley<sup>2,3</sup>, Rachel King<sup>1</sup>

7 **Affiliations:**

8

9 <sup>1</sup> Institute for Global Health Sciences, University of California, San Francisco, (UCSF) USA

10

11 <sup>2</sup> Medical Research Council/Uganda Virus Research Institute and London School of Hygiene &  
12 Tropical Medicine (MRC/UVRI & LSHTM) Uganda Research Unit, Uganda

13

14 <sup>3</sup> Department of Global Health and Development, London School of Hygiene & Tropical  
15 Medicine, London, UK

16

17

18 Formatted for submission to PLOS Global Public Health, no word limit

19 **ABSTRACT**

20 **Background:**

21 Pregnant young women who engage in high-risk sexual activity are at elevated biological and  
22 social risk for HIV acquisition. PrEP serves as an effective means of HIV prevention, including  
23 during pregnancy. This study aimed to explore attitudes, experiences and challenges with PrEP  
24 to understand what motivates or limits PrEP uptake and adherence during pregnancy among  
25 this population of young women.

26 **Methods:**

27 Semi-structured interviews were conducted with 23 participants, recruited from the Prevention  
28 on PrEP (POPPI) study in the Good Health for Women Project clinic in Kampala, Uganda.  
29 POPPI's inclusion criteria comprised of HIV-uninfected women, aged 15-24, who engaged in  
30 high-risk sexual activity. Interviews focused on experience with PrEP and pregnancy. Data were  
31 analyzed utilizing a framework analysis approach.

32 **Findings:**

33 Key themes were comprised of participant barriers to and facilitators of PrEP uptake and  
34 adherence. Reasons for PrEP initiation included desire for autonomy and agency, mistrust of  
35 partners, and social support. Participants expressed challenges with initiating or sustaining their  
36 use of PrEP, including PrEP access and perceived or felt stigma. During pregnancy,  
37 participants' primary motivators for altering PrEP use were either understanding of PrEP safety  
38 for their baby or changes in perceptions of their HIV risk. Many of these factors were similar  
39 across participants who had experience with pregnancy and those who did not.

40 **Interpretation:**

41 This study highlights the importance of addressing barriers to and facilitators of PrEP  
42 adherence, especially during pregnancy where risk is elevated, with a multi-level approach.  
43 Community-oriented education, stigma reduction activities alongside access to PrEP, can serve

44 as means for adherence. The development of robust PrEP adherence support guidelines  
45 regarding PrEP use during pregnancy among high-risk women, and strategies for their  
46 implementation, are of utmost importance for the control of HIV in key populations and the  
47 elimination of mother-to-child transmission of HIV.

48

49 **Keywords: PrEP, pregnancy, sex work, Africa, Uganda**

## 50 INTRODUCTION

51 There have been substantial advances in HIV testing and treatment globally. However, despite  
52 these gains, there were 1.7 million new HIV infections worldwide in 2019 before the global  
53 COVID pandemic, of which almost 60% occurred in sub-Saharan Africa.(2)

54 The Joint United Nations Programme on HIV/AIDS defines transactional sex as “a non-marital,  
55 non-commercial sexual relationship motivated by an implicit assumption that sex will be  
56 exchanged for material support or other benefits”. (3, 4) Transactional sex is different from  
57 formal sex work as the relationship or exchange between individuals may not be formally  
58 established; it is inclusive of relationships with shared emotional intimacy as well as exchanges  
59 of money and goods for sex.(2) In the case of formal sex work, sex is explicitly suggested as a  
60 commercial commodity. Much social research on HIV has not included women who engage in  
61 sex work of *all kinds*, often due to a lack of categorization of transactional sex practices. Thus,  
62 data regarding female sex workers (FSWs), a commonly used classification, often  
63 underestimates the number of women who engage in similar sexual behaviors.(2) Here we refer  
64 to both formal sex workers and women who engage in transactional sex, as young women who  
65 are high-risk (YWHR).

66 In Uganda, women who engage in both transactional and non-transactional sex have one of the  
67 highest risks for HIV acquisition. This is the case even in comparison to other high-risk groups  
68 including men who have sex with men, injection drug users, and prisoners.(5) HIV prevalence  
69 amongst FSWs is close to 33%.(5, 6) FSW in Uganda reside mostly in urban centers as well as  
70 some rural regions of the country. Because sex work is illegal in Uganda, they must operate  
71 amongst informal sectors of society. (7) FSWs, can be prosecuted and incarcerated even  
72 without strong evidence.(7) As a result, they face a number of challenges to well-being relating  
73 to criminalization, violence, mobility, stigma, and other abuse.(8) Legal barriers, along with

74 cultural and religious constraints, perpetuate stigma and social isolation. Thus, navigation of  
75 reproductive and sexual health resources remains extremely difficult for FSW in Uganda.

76 While these vulnerabilities are true for high-risk women of all ages, the vulnerability of young  
77 women is heightened. Young women new to sex work are at higher risk for contracting HIV and  
78 other sexually transmitted infections (STIs).(9) Biologically, younger women possess an  
79 increased risk for trauma upon sexual contact compared to older women. There are some  
80 possible explanations from Dellar *et al* (2015) such as an immature cervix with the exposure of  
81 a higher proportion of genital mucosa with high levels of genital inflammation.(10) Behaviorally,  
82 higher incidence of drug use has been associated with YWHR.(9) Socially and culturally,  
83 societal pressures are harder to navigate for younger, less powerful members of society. (10)  
84 Additionally, due to the illegality of sex work in Uganda, YWHR are forced to work and live in  
85 areas of cities that are least equipped with adequate health resources.(9) As a result, HIV  
86 prevention services for YWHR are limited, and there is a need for interventions that address the  
87 specific sociopolitical and cultural barriers that affect this population.

88 The Prevention on Pre-exposure Prophylaxis (POPPI), the parent study of this sub-study, has  
89 examined YWHR in Uganda amongst their social and sexual networks.(11) POPPI aimed to  
90 empower YWHR with effective HIV prevention tools that they were able to control and  
91 administer themselves, namely Pre-exposure Prophylaxis (PrEP) and HIV oral fluid self-  
92 tests.(11) The study focused on this young population to both intervene early, before women are  
93 infected, and provide services to a group that maybe overlooked or have difficulty accessing  
94 healthcare.

95 Little research has been conducted on adherence to PrEP once YWHR become pregnant.  
96 Addressing uptake and adherence among such women is of critical concern because many  
97 YWHR continue to work during early stages of pregnancy to make money before they are no  
98 longer able to work. In addition, pregnancy itself is a vulnerable time for contracting HIV as it

99 causes biological changes, including alterations in levels of progesterone and estrogen and the  
100 vaginal environment, which are known risk factors for HIV infection.(12, 13) Additionally,  
101 pregnancy modifies innate and adaptive immunity, creating a lowered immune response  
102 throughout pregnancy. Contracting HIV during pregnancy also increases risk for maternal-to-  
103 child transmission; thus, understanding the determinants of HIV prevention and PrEP  
104 adherence during pregnancy is critical for both pregnant YWHR mothers and their children.(13)

105 The WHO acknowledges concerns regarding PrEP and potential adverse birth outcomes,  
106 however strongly recommends Tenofovir-based PrEP for pregnant, high-risk populations.(1)

107 There is consensus that the risks of contracting HIV during pregnancy, birth and breastfeeding  
108 far outweigh the largely unknown risks of PrEP use.(14) There are a number of policy and  
109 health-systems barriers that affect the way PrEP is used prior to and during pregnancy. These  
110 barriers can create uncertainty regarding the safety of PrEP for pregnant women, as this  
111 information is often not readily available to the public and/or enforced within health facilities and  
112 care protocols.(14) Social level barriers surrounding PrEP stigma and misconceptions affect  
113 PrEP acceptance and access, as taking PrEP is often equated to taking anti retroviral  
114 medication when already infected with HIV. For populations who are wary of being exposed in  
115 terms of occupation or sexuality, this misconception makes it risky to be seen taking the pill.(1)

116 Taking PrEP may also imply that one is actively engaging in sexual activity. As a result, taking  
117 PrEP for individuals in partnerships could suggest unfaithfulness and women more often than  
118 men may be accused of this.(1) Lastly, personal barriers, including education to assess the risks  
119 and benefits of taking PrEP and adhering to it while pregnant and breastfeeding, must be  
120 considered.(1) Thus, evaluation of the multi-level barriers of using PrEP during pregnancy and  
121 the postpartum period, is crucial to understanding attitudes towards PrEP and PrEP adherence  
122 among a high risk population. As part of the POPPi study, the present sub-study explored the

123 way these barriers impact YWHR in Uganda, along with general attitudes of YWHR towards  
124 PrEP in hopes to understand what motivates PrEP adherence, or lack of, during pregnancy.

125

## 126 **MATERIALS AND METHODS**

127 The goal of the parent study, (POPPI) was to develop and assess an intervention to enhance  
128 initiation and adherence to PrEP among HIV negative Young Women at High Risk which began  
129 recruitment in February 2019 and completed a 12-month follow-up in 2020.

130 In 2017, the study team mapped out hot spots and popular meeting points frequented by young  
131 women and high-risk youth in urban Kampala, the capital city of Uganda (population about 2.5  
132 million). Phase 1 of POPPI consisted of conducting focus group discussions (FGDs) and  
133 interviewing participants to both understand the use of HIV prevention services and identify the  
134 overall feasibility and acceptability of the proposed behavioral intervention to improve uptake  
135 and adherence to PrEP. Focus groups were held with community members, YWHR, key  
136 informants, and peer educators, and interviews were specifically conducted with key-informants  
137 at the study clinic. Phase 2 of the study was a pilot randomized controlled trial (RCT) comparing  
138 POPPI intervention outcomes to the study clinic's standard of care. This intervention consisted  
139 of group sessions on health empowerment, PrEP literacy, and social empowerment, along with  
140 individual counseling sessions on topics like HIV and STI transmission, and family planning.  
141 Phase 2 included a 12-month follow-up, to evaluate PrEP uptake and adherence using self-  
142 report and a biomarker of PrEP drug levels in hair.

### 143 ***Sub-Study Design***

144 This sub-study employed a qualitative methodology given the nature of the research question,  
145 which focused on informing elements such as health-seeking behavior, decision-making, and  
146 motivations that were best captured through a flexible form of data collection, specifically group

147 discussions and semi-structured interviews aimed to gather views on focused topics, while  
148 remaining open to accommodate new and emerging subjects and themes in a private and  
149 confidential manner.

150 The recruitment process and data collection started in February 2020, data collection continued  
151 through June 2020.

### 152 ***Study Participant Selection and Recruitment***

153 The study population of interest was the same as the parent study (POPPI): young women who  
154 engage in high-risk sexual activity as defined by the behavior that put them at risk of contracting  
155 HIV, other STIs, or getting pregnant, a definition that is used within the study clinic where other  
156 studies on this population were implemented. The clinic recruitment questions included:

157 *Have you been on a fishing landing site in the past 3 months? Have you had an STI in the*  
158 *last 3 months? How many times do you have sex with different partners a day? How many*  
159 *irregular and regular sexual partners do you currently have? How many times do you use*  
160 *condoms with those different partners?*

161 Women were recruited from bars and lodges in Kampala, where commercial sex was available,  
162 and subsequently screened for HIV, hepatitis B, and creatinine levels. They were then enrolled  
163 in POPPI at the study clinic. For the purposes of this sub-study, potential participants were  
164 identified by the POPPI research team and contacted by phone, based on their knowledge and  
165 rapport with POPPI participants and their ability to assess eligibility.

166 Participant eligibility mirrored POPPI's inclusion criteria, as follows: women aged 15-24 years  
167 currently enrolled in POPPI in Kampala, Uganda, testing HIV-antibody negative at enrolment in  
168 this study, having demonstrated understanding of POPPI study guidelines and scope, and  
169 providing oral and written consent. Eligible women were recruited into one of four categories to  
170 acquire relevant themes for data analysis: (1) PrEP-naive, (2) having started and stopped PrEP,



171 (3) having started, stopped, and reinitiated PrEP, and (4) stable on PrEP. Of these, women who  
172 were currently pregnant or had previously been pregnant while enrolled in the study, were  
173 contacted first. Nulliparous women were contacted to supplement as needed to fill the four  
174 categories of PrEP. No specific pregnancy duration or timeframe was used given the young age  
175 of participants implying any past pregnancy likely occurred fairly recently.

#### 176 ***Data collection***

177 Interviews began in February 2020 and were conducted by an experienced social science  
178 interviewer, in Luganda either at the study clinic or at participants' homes. Participants were  
179 compensated 20,000 Uganda shillings (about US \$6) for their time. Participants were identified  
180 solely by their study IDs; no identifiable data were recorded. De-identified data were securely  
181 stored on an encrypted device and audio recordings were deleted after transcription was  
182 completed.

183 A total of 23 interviews were conducted and analyzed reached thematic saturation.(15)

184 Interviews followed a semi-structured guide which contained an introduction to the study, asked  
185 participants for a brief background including their sexual and reproductive history and  
186 characteristics, and categorized specific questions and probes by modes of inquiry. The two  
187 major modes of inquiry, experience with PrEP and PrEP and pregnancy, asked participants  
188 about motivations to take PrEP, knowledge on the prevalence of PrEP use in the community,  
189 personal PrEP use and adherence during pregnancy, and types of care and support available  
190 while pregnant.

191 **Data analysis**

192 Audio recordings of the interviews were uploaded onto a secure device, first transcribed in  
193 Luganda, and subsequently translated to English. A framework analysis approach was used for  
194 data analysis (Figure 2).(16) The analytical framework in this approach allowed the researchers  
195 to map and categorize data as well as find associations and ultimately derive conclusions.(17)  
196 Transcripts were uploaded to NVivo, a qualitative data analysis software, where they were  
197 coded. A codebook was developed, defining each of the codes, both broader, thematic codes,  
198 and sub-codes that fell under the themes.(16) The codes were then re-applied to the transcripts  
199 in NVivo, with heightened scrutiny and attention. A framework analysis matrix was developed in  
200 Microsoft Excel using major themes as categories and summarizing each transcript by category.  
201 These summaries contained quotes, observations, and overall content summarization. Once the  
202 data was in the framework analysis matrix, it was interpreted and used to derive associations,  
203 interpretations and conclusions.(16) The preliminary findings were summarized and presented  
204 both to study staff members and a selected group of study participants.

205 Ethical considerations:

206 All participants provided written informed consent and understanding was assessed. We  
207 included some minors in this study (seven in total). As many young sex workers are actually  
208 orphans, in agreement with the Uganda National Council of Science and Technology, all minors  
209 who fit with the definition of 'emancipated minors' were eligible to consent to research without  
210 their parents also consenting.

211

212 **RESULTS**

213 **Participants**

214 Almost half (48%) of the participants fell between the ages of 19-21 years, (Table 1). In terms of  
 215 educational background, Uganda's education system includes seven years of primary level  
 216 education and six years of secondary level, followed by tertiary or university education.(18) Most  
 217 participants had left school, due to a lack of financial capability to continue education, either  
 218 during Primary or Secondary school. The majority of participants declared themselves Roman  
 219 Catholics or Muslims (30% and 22%).

220

221 **Table 1.** Participants' demographic characteristics, Kampala, Uganda

| <i>Participant Characteristics (n=23)</i> |                      |                    |
|-------------------------------------------|----------------------|--------------------|
| <i>Characteristics</i>                    | <i>Frequency (n)</i> | <i>Percent (%)</i> |
| <b>Age</b>                                |                      |                    |
| 15-18                                     | 7                    | 30%                |
| 19-21                                     | 11                   | 48%                |
| 22-24                                     | 5                    | 22%                |
| <b>Highest formal education</b>           |                      |                    |
| Started Primary                           | 7                    | 30%                |
| Completed Primary                         | 4                    | 17%                |
| Started Secondary                         | 11                   | 48%                |
| Completed Secondary                       | 1                    | 4%                 |
| <b>Religion</b>                           |                      |                    |
| Born Again Christian                      | 4                    | 17%                |
| Catholic                                  | 7                    | 30%                |

|                                  |   |     |
|----------------------------------|---|-----|
| <i>Church of Uganda-Anglican</i> | 3 | 13% |
| <i>Muslim</i>                    | 5 | 22% |
| <i>Adventist</i>                 | 1 | 4%  |
| <i>Hindu</i>                     | 1 | 4%  |
| <i>Unknown</i>                   | 2 | 9%  |

With regards to sexual and reproductive history and characteristics, most participants had either one or no children. The majority had between one and nine different sexual partners within a

228 one-month period (Table 2). When asked about condom use with spouses or partners they lived  
 229 with and with paying customers within the past month, most participants said they *never* used  
 230 male condoms with partners, while with paying customers the majority of participants  
 231 *sometimes* used male condoms (Table 2). The two most common reasons for not using male  
 232 condoms during sexual interactions with either partners or paying customers were: 1) sexual  
 233 partners preferred sex without condoms, and 2) there were no condoms available. Most  
 234 participants reported not having used addictive substances in their lifetime, however, for those  
 235 who did, the substances consumed were shisha (tobacco), mayirungi (khat), and cocaine (Table  
 236 2).

237

238 **Table 2.** Participants' sexual and reproductive health characteristics, Kampala, Uganda

| <i>Participant Sexual and Reproductive Characteristics (n=23)</i> |                      |                    |
|-------------------------------------------------------------------|----------------------|--------------------|
| <i>Characteristics</i>                                            | <i>Frequency (n)</i> | <i>Percent (%)</i> |
| <b><i>Number of children</i></b>                                  |                      |                    |
| 0                                                                 | 12                   | 52%                |
| 1-2                                                               | 10                   | 43%                |
| 3-4                                                               | 1                    | 4%                 |
| <b><i>Number of total partners (in the past month)</i></b>        |                      |                    |
| 1-9 partners                                                      | 16                   | 70%                |

|                                           |                                                  |                                                  |
|-------------------------------------------|--------------------------------------------------|--------------------------------------------------|
| <i>10-19 partners</i>                     | 2                                                | 9%                                               |
| <i>20-49 partners</i>                     | -                                                | -                                                |
| <i>Over 50 partners</i>                   | 2                                                | 9%                                               |
| <i>No data</i>                            | 3                                                | 13%                                              |
| <b>Condom Use<br/>(in the past month)</b> | <i>With partners   With paying<br/>customers</i> | <i>With partners   With paying<br/>customers</i> |
| <i>Never</i>                              | 8   5                                            | 35%   22%                                        |
| <i>Sometimes</i>                          | 5   8                                            | 22%   35%                                        |
| <i>Most of the time</i>                   | 1   4                                            | 4%   17%                                         |
| <i>Always</i>                             | 3   2                                            | 13%   9%                                         |
| <b>Drug Use (Ever)</b>                    |                                                  |                                                  |
| <i>Yes</i>                                | 7                                                | 30%                                              |
| <i>No</i>                                 | 15                                               | 65%                                              |
| <i>No data</i>                            | 1                                                | 4%                                               |

239

240 Participants were categorized based on PrEP status and parity, as seen in Figure 1. In the text  
 241 we have identified participants based on age groups, under 20 and 20-24 years old as well as  
 242 PrEP status. Most participants reported they were *stable on PrEP* and *not currently pregnant*.  
 243 Many participants had a pregnancy during their lifetimes but, because they did not get pregnant  
 244 during the course of the POPPi study, were excluded from the *previously pregnant* category.  
 245 We determined five major themes around barriers to, and facilitators of adherence to PrEP: 1)  
 246 agency and trust, 2) safety, 3) HIV and sex work-related stigma, 4) social support and societal  
 247 perceptions, and 5) access to PrEP and PrEP information.

#### 248 **Agency and trust**

249 Participants' decisions to initiate PrEP and stay consistent on PrEP were influenced by their  
 250 desires for autonomy over their sexual health and livelihood. One participant under 20 years old,

251 who was stable on PrEP and pregnant at the time of the interview, expressed her preference for  
252 PrEP over other forms of HIV prevention, like condoms:

253 *Because with PrEP, it's you to control it, if you don't swallow it, it's you to get infected but*  
254 *for a condom, if it's to burst, [you have no control over it]."*

255 She described a sentiment that multiple participants shared, that PrEP enabled a choice to  
256 protect one's life. Thus, upon learning about PrEP, many were motivated to try it.

257 Many participants also expressed that mistrust in partners influenced their desire to take PrEP.  
258 Participants who did not trust their partner's behavior, in terms of having multiple sexual  
259 partners, found PrEP to be a way to ensure their own health, while a few who were consistently  
260 with a partner they trusted, did not feel the need to take PrEP. One participant shared a  
261 conversation she had with her partner.

262 *"I explained to him the reason I was swallowing these pills [PrEP], but if he is serious that we*  
263 *are going to be together at home and he is not going to have partners outside our*  
264 *relationship I can stop them because even the basawo [doctors] told me that if a time comes*  
265 *and I get a serious partner and we are going to stay together it is your right to stop*  
266 *swallowing the pills"* (under 20 years old, stable on PrEP, previously pregnant).

267 This trust, or lack thereof, also extended to partners' use of condoms. All participants reported  
268 experience having tried to use condoms regularly. Participants who were able to ask customers  
269 and regular partners to use condoms were less inclined to stay on PrEP. Those who were  
270 unable to ensure condom use during sexual interactions were more motivated to take PrEP.

271 Additionally, a few participants also expressed trusting their partners enough not to use  
272 condoms. If this was the case, they were still able to use PrEP to maintain continuous  
273 protection. As expressed by one participant:

274 *“There is only one guy I don’t use a condom with and that’s because when we first met, he*  
275 *told me we go to hospital and test together which we did, and we were both HIV negative.*  
276 *But I still take PrEP whether I’m meeting with this guy or with any other customer”* (under 20  
277 years old, stable on PrEP, previously pregnant).

278 PrEP allowed women choices within their occupation as well as opportunities for future  
279 occupations. Some participants were motivated to take PrEP to stay healthy in the present, so  
280 that future work opportunities and pathways of life would remain open. When describing her  
281 conversations with other women, one participant shared,

282 *“I tell them that we have to adhere to PrEP because we don’t know what’s ahead of us*  
283 *according to the kind of work we do. Let’s take our drugs because it’s for our own good, you*  
284 *never know in future we might decide to quit this work but it is good to quit when we are still*  
285 *negative and [able to] do other things”* (20-24 years old, stable on PrEP, not pregnant).

## 286 **Safety**

287 Issues of safety related to personal security, PrEP safety, and occupational safety were the  
288 most commonly discussed reasons for initiating or stopping PrEP. Participants expressed  
289 PrEP’s ability to provide personal protection even when customers, partners, and society at  
290 large could not. In situations where condoms were not an option (customer tore them, refused to  
291 wear them, condoms were expired/burst, or not available), participants were still able to keep  
292 themselves physically safe.

293 Participants talked about the inability of society to keep YWHR and the sex worker community  
294 safe. If participants were in a situation where force was used, or a customer refused to wear a  
295 condom, there was no one to turn to. Thus, it was their own responsibility to ensure their  
296 personal safety. Two participants shared these experiences,

297 *“At times you link up with a customer and you agree with him that you are going to use*  
298 *a condom and on reaching inside the room he insists he wants live [condomless] sex;*  
299 *when you make an alarm the outsiders laugh” (20-24 years old, stable on PrEP,*  
300 *previously pregnant).*

301 *“Me, I want condoms but what if he refuses and uses force on you?...Remember you’re*  
302 *at his place you have nowhere to report him. You also fear to say you were raped. Me, I*  
303 *fear” (under 20 years old, stable on PrEP, not pregnant).*

304 The safety or lack of safety of PrEP was a large determinant as to whether participants sought  
305 out PrEP and continued to take the drugs. Most participants were aware that PrEP was safe for  
306 pregnant women and their unborn babies; however, some participants believed that PrEP would  
307 harm the baby. This was the most common reason for not initiating PrEP amongst participants  
308 who had experience with pregnancy.

309 *“When I was pregnant with this child I was told to take PrEP which I somehow feared but*  
310 *then I accepted to take it, reaching home I again feared and decided to take the pills*  
311 *back to the clinic and told the counselors I would take the pills after pregnancy because I*  
312 *feared that the pills might affect my unborn baby” (20-24 years old, started, stopped, &*  
313 *re-initiated PrEP, previously pregnant).*

314 One participant feared that taking PrEP during pregnancy would interfere with her high blood  
315 pressure, so she stopped. Another was not comfortable with the PrEP-related side effects she  
316 experienced during her pregnancy; she also took a break from the drugs. All participants who  
317 were on PrEP mentioned side effects as part of their experience with the medication, though in  
318 most cases, these effects did not deter participants from initiating or persisting on PrEP. Those  
319 who considered PrEP safe and trusted PrEP either had been tested after having unprotected  
320 sex and were still HIV negative or had heard from friends that the drug was effective.



321 Another factor that led many participants to stop PrEP use was the safety of high-risk work while  
322 pregnant. Though some women who became pregnant continued to work for the first three to  
323 five months of pregnancy, there were many who stopped working due to the perceived and real  
324 danger of multiple sexual partners while pregnant. Because these women were not working,  
325 they stopped taking PrEP.

326 *"We get customers who beat us up and kick us, I realized I would get complications and*  
327 *besides they say it's not good to sleep with different men while pregnant. The child may*  
328 *get complications"* (20-24 years old, never started PrEP, currently pregnant).

### 329 ***HIV and sex work-related stigma***

330 All 23 participants discussed their experiences with PrEP-related stigma. Because PrEP pills  
331 resemble HIV antiretrovirals (ARVs), participants shared that society understood that those who  
332 take PrEP are HIV positive, as most did not know the difference between PrEP and ARVs.  
333 Thus, the high-risk community on PrEP is stigmatized similarly to individuals who are HIV  
334 positive.

335 *"I cannot talk to anyone about it [PrEP] because people have different views about the*  
336 *drug. Someone can show you they have understood and accepted yet in actual sense*  
337 *they have not bought the idea and even talk about you to other people telling them you*  
338 *are HIV positive"* (under 20 years old, stable on PrEP, not pregnant).

339 Most participants were unable to share that they were on PrEP with friends, family, and  
340 partners. In many cases, this did not deter participants from initiating PrEP; however, it made it  
341 challenging to stay consistent with PrEP. Some participants would take their pills in secret and  
342 lie to family and partners about the medication. One participant was going to stay with friends  
343 for a while and intentionally left her PrEP at home for fear of her friends finding the PrEP  
344 container.

345 *"I thought they will think I am HIV infected because if someone knows you're infected*  
346 *they can't love you the same way as before"* (under 20 years old, stable on PrEP, not  
347 pregnant).

348 Stigma also played a role in dictating at what point participants had to stop working. A few  
349 participants spoke about personal or friends' experiences working through the first few months  
350 of pregnancy but not being able to attract customers once the pregnancy was showing due to  
351 stigma, and thus not initiating or persisting taking PrEP because not sexually active.

352 *"Once pregnant, we get off the streets. . . it's because no one can buy a pregnant*  
353 *woman when he is seeing [another] one who is not [pregnant]"* (20-24 years old, stable  
354 on PrEP, not pregnant).

355 Participants spoke of instances regarding stigma in healthcare settings. Many participants went  
356 to government hospitals to access free antenatal care. Some descriptions of stigma related to  
357 sex work did not emerge as a major indicator of starting or stopping PrEP; however, a  
358 participant described the way in which this stigma could lead to difficulties with obtaining PrEP  
359 when a high-risk woman was pregnant.

360 *"After getting pregnant those girls don't want to go back where they were accessing*  
361 *PrEP from...There is a neighbor of mine who used to get her medicine from Mulago but*  
362 *when she became pregnant she did not go back"* (under 20 years old, stable on PrEP,  
363 previously pregnant).

#### 364 ***Social support and societal perceptions***

365 Participants described the role of social networks and societal perceptions in encouraging  
366 initiation into sex work, motivating PrEP use, and influencing community health and safety.  
367 Often, participants were recruited into sex work by their friends who noticed that participants  
368 were unhappy in their current occupations or without income and saw sex work as an economic

369 opportunity. Thus, many participants followed their friends into sex work, often living together or  
370 with groups of women who all worked as sex workers together.

371 Information on PrEP and HIV prevention traveled through the high-risk community from  
372 individual to individual, influencing participant opinions and choices. These perceptions  
373 influenced participant behavior as some participants hid PrEP from their friends while others  
374 encouraged their fellow sex workers to join studies where they could access PrEP and care.  
375 Most participants were told about the POPPi study by other friends and continued to recruit  
376 friends throughout their time in the study. An under 20-year-old study participant, stable on  
377 PrEP and previously pregnant, described her experience with educating a friend about PrEP.

378 *"A friend of mine was so worried that men will infect her with HIV because they don't*  
379 *want to use condoms and she wanted to know where she could get PrEP, I showed her*  
380 *what the pills look like and told her to search around for them."*

381 Although participant behavior regarding PrEP was influenced by societal perceptions, social  
382 networks did not seem to determine whether participants stopped or stayed consistent on PrEP.  
383 Support for high-risk women, outside of smaller social networks, especially for pregnant women,  
384 was unknown to the participants. All participants stated they did not know of any organizations,  
385 individuals/communities, or systems for support for pregnant sex workers and high-risk women,  
386 aside from those offered at the study clinic. One participant, when asked how she supported  
387 herself while pregnant shared,

388 *"Sometimes the father of this child would give me financial support. I would be patient*  
389 *and wait in case I used it up. I used to plan, stock food and used the rest to shop for the*  
390 *baby. Feeding was hard, I used not to eat food"* (20-24 years old, never started PrEP,  
391 previously pregnant).

392 ***Access to PrEP and PrEP information***

393 As a part of the study clinic and the POPPi study, participants were given access to PrEP  
394 according to Uganda's Ministry of Health guidelines. This allowed participants education on how  
395 to use PrEP, when to take it, and how to integrate it into one's lifestyle. However, amongst  
396 larger communities of women engaging in sex work, participants stated that many did not know  
397 about the existence of PrEP.

398 *"It's not easy if the hospital has not informed you, however for us we got a chance that*  
399 *we have a clinic which informs us...When you look at our government have you ever*  
400 *heard it announce pills preventing HIV...All they do is to give out condoms and that's*  
401 *why our clinic is a better option, it sensitizes you about new things"* (20-24-year-old,  
402 stable on PrEP, previously pregnant)

403 Along with lack of access to information on PrEP, another participant expressed that it is difficult  
404 for women to find PrEP in health facilities and physically access it.

405 *"If PrEP is medicine for HIV/AIDs prevention, how come for us, in clinics and*  
406 *pharmacies, we don't find it."* Often, women are unable to travel to go get the medication  
407 even if it is provided at government hospitals. (20-24-year-old, stable on PrEP, currently  
408 pregnant)

409 One participant brought up the potential expense associated with the drug when asked if  
410 pregnant women have access to PrEP. While access to PrEP was not a barrier for participants  
411 in this study, they communicated that access to PrEP outside of the study would prevent women  
412 they knew from taking the medication.

413

## 414 **DISCUSSION**

415 This qualitative study, nested within the POPPi study, aimed to understand major barriers to,  
416 and facilitators of PrEP uptake and adherence amongst young, pregnant and non-pregnant,

417 high-risk women in Kampala, Uganda. Most common reasons for PrEP initiation included desire  
418 for autonomy and agency, trust and lack of trust of partners, social support, stigma, and societal  
419 perceptions of PrEP. Participants expressed a few challenges with initiating or staying  
420 consistently on PrEP, including PrEP access and stigma. During pregnancy specifically,  
421 participants' primary motivators for altering PrEP use were either understanding and  
422 misunderstanding PrEP safety or changes in beliefs regarding their HIV risk. These findings  
423 were organized within the 'Barriers to PrEP use' framework adapted from Davies and Heffron, to  
424 demonstrate the interrelatedness of PrEP barriers and facilitators and understand them within  
425 the personal, societal health systems, and larger policy level actors (Figure 2).(1)

426

#### 427 ***Personal Level***

428 At the personal level, participant motivations for and challenges with taking PrEP were largely  
429 dependent on the way PrEP made individuals feel. For many, the medication provided a feeling  
430 of personal protection and control over one's body and health. Participants were less reliant on  
431 partners and customers, and their use of condoms, to ensure their protection from HIV.

432 PrEP also enabled participants to foresee a future in which they continued to be healthy enough  
433 to work and transition into opportunities other than sex work. Previous studies have described  
434 low PrEP uptake amongst young, mobile populations due to difficulties with adherence and low  
435 perception of risk.(19) However, many participants in POPPi were aware of their vulnerability  
436 and high-risk circumstance, and thus, were eager to take PrEP. This may have, in part, been  
437 due to this study population's exposure to HIV education, as lowered risk perception has been  
438 seen in populations with less robust HIV education.(20)

439 Participants who faced personal difficulties with staying on PrEP attributed these to the drug's  
440 side effects. Though these side effects were not unexpected for most and did not deter  
441 participants from initiating PrEP, they created anxieties around taking the drugs along with

442 disruptions in their schedules, causing their PrEP adherence to fluctuate. Many participants  
443 worked extremely late nights and early mornings, and thus, having to remember to take a pill  
444 daily at the same time proved difficult. Both experiences with side effects and challenges with  
445 PrEP logistics make a case for longer-acting PrEP formulations and adequate time to adjust to  
446 side effects.(20) Participants expressed anticipation of a form of PrEP that could be taken  
447 monthly, or every six months. The recent successful performance of injectable PrEP could  
448 drastically eliminate many of these barriers for high-risk communities.(21)

449 A woman's risk of HIV acquisition doubles during pregnancy and breastfeeding.(22) Though this  
450 heightened risk was not a driver of changes in participant engagement in risky behaviors,  
451 participants' understanding of their HIV risk changed throughout pregnancy. Because some  
452 participants were unable or unwilling to work throughout pregnancy, due to fear of harm directed  
453 at themselves and their child, many stopped taking PrEP. Others worked through the first three  
454 to five months of their pregnancies and would take PrEP while sexually active; these  
455 participants stopped PrEP when they stopped working. Either way, most were able to accurately  
456 identify their risk periods and adjusted their PrEP use accordingly. Understanding risk and  
457 perceptions of risk has been known to aid in PrEP consistency and uptake.(23) This feature,  
458 demonstrated by the participants, is likely also attributed to robust HIV education through the  
459 POPPi study.

#### 460 ***Societal Level***

461 Social perceptions of PrEP were crucial in participants' understanding of the medication and the  
462 way in which participants could take PrEP comfortably. Participants often learned about PrEP  
463 from their social networks and were either encouraged or discouraged to initiate the prophylaxis  
464 by peers. Social and peer support appeared to be critical to the process of accessing and  
465 adhering to PrEP, confirming what has been found in a number of vulnerable communities.(24,  
466 25)

467 Participants were challenged by both HIV and sex work-related stigma that pervaded society.  
468 Most participants said they hid their PrEP use from family, friends, and partners, for fear of  
469 being mistaken as an HIV-infected person taking ARV, thus making it difficult to stay consistent  
470 on the medication. Nevertheless, participants found creative ways to navigate stigma out of  
471 necessity and it did not seem to serve as a barrier for PrEP initiation or continuation.  
472 Partner “buy-in” and trust were other important factors in shaping participants’ PrEP use.  
473 Previous studies explored the role of partner influence, often as a barrier to taking PrEP, a  
474 theme that emerged in this study as well.(26) In this study, partners directly influenced  
475 participants perceptions of the drug itself, as when partners’ misunderstandings or  
476 misperceptions of PrEP or sexual history and patterns either hindered or reinforced women  
477 participants’ attitudes and practices with PrEP.

#### 478 ***Health Systems Level***

479 Although study participants were uniquely positioned to understand, access and receive care  
480 and support about PrEP, they spoke of the health system barriers that impacted their peers’ and  
481 communities’ ability to safely access PrEP and the lack of provision, information and support  
482 provided by the government and large hospitals regarding PrEP. Previous studies have  
483 demonstrated that physical access to PrEP is correlated to PrEP uptake.(26) Though this did  
484 not affect participants in this study, physical access is likely a challenge for other members of  
485 the YWHR community.

486 Pregnant or previously pregnant participants also expressed that pregnant YWHR face  
487 healthcare stigma in Uganda and a lack of known support systems for pregnant, high-risk  
488 women. Most could not name an organization or community space other than the study clinic  
489 that provided care for pregnant YWHR. Pregnancy rates are generally very high in Uganda and  
490 extremely high amongst the high-risk community in high-HIV burden regions, thus making the  
491 lack of support system and structures for this especially vulnerable population a critical gap for

492 the overall health of young women and the elimination of mother-to-child transmission of HIV in  
493 Uganda.(27)

#### 494 ***Policy Level***

495 Pregnant or previously pregnant women in the study faced many of the same challenges as  
496 those who did not have pregnancy experience. However, a primary motivator of pregnant  
497 participants for declining, stopping, or waiting to initiate PrEP until after pregnancy, was the  
498 question of safety of PrEP during pregnancy. The World Health Organization (WHO)  
499 recommends offering PrEP to pregnant and breastfeeding women who are at a high risk for HIV  
500 acquisition.(22) Though much of PrEP-related literature does not report any adverse effects of  
501 PrEP on mother or child throughout pregnancy, this is a highly under-researched area.(27, 28)  
502 Due to the prioritization of fetal health, often times over maternal health, clinical research has  
503 historically excluded pregnant women from trials relating to PrEP safety. As a result, though  
504 many international policies do not exclude pregnant women from the population eligible for  
505 PrEP use, safety is still a large concern and the majority of studies call for more research.  
506 Uganda's policy suggests PrEP for the HIV-negative partner in an HIV discordant couple and  
507 does not contraindicate PrEP during pregnancy or breastfeeding.(1) Most participants in this  
508 study who did not wish to initiate PrEP while pregnant or who stopped PrEP over the course of  
509 their pregnancy were worried about potential effects on their babies. Many stated they were  
510 taught at some point in their lifetimes that taking drugs while pregnant was not safe for the fetus.  
511 This fear is extremely important to consider as pregnancy and breastfeeding are critical times  
512 for HIV acquisition.(22) Most participants who were educated about the safety of taking PrEP  
513 while pregnant, when asked, recommended that high-risk women stay on PrEP throughout  
514 pregnancy. Thus, both additional research and educational interventions are necessary to  
515 appropriately address fears surrounding PrEP's fetal effects.



516 Recommendations for improvements in PrEP adherence can also be conceptualized within the  
517 multi-level barrier and facilitator framework. At the personal level, educational interventions  
518 could help YWHR navigate changing life circumstances with regards to partners and  
519 pregnancy.(23) At the social level, targeting sexual and social networks is extremely important  
520 for interventions, along with education that targets YWHR networks, especially their male  
521 partners who are socially positioned not only to alter their own behaviors with regards to PrEP  
522 but also to encourage PrEP use amongst their sexual partners.(29) Integrating wider social  
523 networks into HIV prevention and PrEP education could aid to reduce stigma.(20) At the health  
524 system level, access is of utmost concern. Ensuring affordable and widespread PrEP access at  
525 hospitals and clinics in Uganda, followed by community-oriented information and education on  
526 PrEP is likely to improve PrEP awareness. Alleviation of barriers such as distance or lack of  
527 transportation for YWHR to obtain PrEP should be part of this effort. Communities must be  
528 offered PrEP in clinical spaces with educational tools available and robust advocacy. Moreover,  
529 national PrEP clinical guidelines with emphasis on PrEP safety during pregnancy are essential.  
530 Equally important is to address the grave consequences that stigmatizing and neglecting  
531 pregnant YWHR carry in terms of these women's and their babies' health.(28) Lastly, though  
532 participants in this study did not speak of the criminalization of sex work in Uganda, this has  
533 profound implications for PrEP access and use at the policy level and for the eventual  
534 elimination of HIV in society.

535 This study contributes to important insights on PrEP adherence within specific high-risk  
536 communities in a sub-Saharan African social and cultural context. It is novel in that it includes  
537 the perspectives of pregnant women among a most vulnerable population. Future studies must  
538 consider the importance of addressing the perspectives and the needs of the poorest of the  
539 poor in the words of late Paul Farmer in order to be able to truly control epidemics.(30)  
540 Mobilizing social services, the transactional sex and sex worker communities, and other

541 community based organizing efforts can help fill gaps in research and interventions, blending  
542 medical, systemic and structural, and behavioral approaches.

### 543 ***Limitations***

544 There were a few limitations to this study. As the study included some non-pregnant women,  
545 perspectives offered by these participants, especially on questions of pregnancy, may not have  
546 been as representative of the pregnant high-risk population. The study also relied on self-report  
547 to understand participant's PrEP use. Thus, participants account of their PrEP use or  
548 willingness to disclose PrEP use may have resulted in some inaccurate information. The study  
549 provides for a biomarker, analysis of drug levels in hair, that will compare with self report.  
550 Another limitation is that the interviews were primarily analyzed by an English-speaking  
551 investigator, thus the process of data analysis in English may have resulted in the possibility of  
552 misinterpretation of words or ideas, as some participant perspectives may have been lost in  
553 translation.

### 554 **CONCLUSION**

555 This study highlights the importance of addressing barriers to and facilitators of PrEP uptake  
556 and adherence with a multi-level approach, incorporating personal, social, health systems and  
557 policy level factors. Though participants reported primarily on PrEP adherence as it related to  
558 their personal and social spheres, their views and experiences stressed the importance of  
559 systemic and policy interventions to promote the safe and effective use of PrEP. The acquisition  
560 of robust evidence about PrEP safety during pregnancy is of critical importance for the  
561 development of clear clinical guidelines and strategies for their implementation toward further  
562 control of HIV in the general population and the eventual elimination of mother-to-child  
563 transmission of HIV.

564

### 565 **ACKNOWLEDGEMENTS**

566 We are appreciative for the support of the community members in Kampala who generously  
567 gave their time to talk to us and we thank MRC/ UVRI and LSHTM Uganda Research Unit. We  
568 are particularly grateful to the POPPi team members for their work in keeping the projects alive  
569 through the COVID-19 pandemic. Thank you.

570

#### 571 **ETHICAL APPROVALS**

572 In Uganda approval was given by the Uganda Virus Research Institute Research Ethics  
573 Committee (GC/127/19/02/564), the Uganda National Council for Science and Technology  
574 (SS4479). At UCSF (IRB approval #322235).

575

576

577

578

579

580

- 581 1. Davies N, Heffron R. Global and national guidance for the use of pre-exposure  
582 prophylaxis during peri-conception, pregnancy and breastfeeding. *Sex Health*. 2018;15(6):501-  
583 12.
- 584 2. UNAIDS. Transactional sex and HIV risk: from analysis to action. Geneva: STRIVE;  
585 2018.
- 586 3. Wamoyi J, Ranganathan M, Kyegombe N, Stoebenau K. Improving the Measurement of  
587 Transactional Sex in Sub-Saharan Africa: A Critical Review. *J Acquir Immune Defic Syndr*.  
588 2019;80(4):367-74.
- 589 4. Wamoyi J, Stobeanau K, Bobrova N, Abramsky T, Watts C. Transactional sex and risk  
590 for HIV infection in sub-Saharan Africa: a systematic review and meta-analysis. *J Int AIDS Soc*.  
591 2016;19(1):20992.
- 592 5. UNAIDS. UNAIDS Data 2019. 2019.
- 593 6. Kharsany AB, Karim QA. HIV Infection and AIDS in Sub-Saharan Africa: Current Status,  
594 Challenges and Opportunities. *Open AIDS J*. 2016;10:34-48.
- 595 7. Tumwesige A dTL, Mwebaza E, Zalwango F, Nanyange J, Jjuuko A. Legal Regulation of  
596 Sex Work in Uganda: Exploring the Current Trends and their Impact on the Human Rights of  
597 Sex Workers. Kampala2016 [Available from: [www.hrapf.org](http://www.hrapf.org)].
- 598 8. Vithalani J, Herreros-Villanueva M. HIV Epidemiology in Uganda: survey based on age,  
599 gender, number of sexual partners and frequency of testing. *Afr Health Sci*. 2018;18(3):523-30.
- 600 9. Goldenberg SM, Chettiar J, Simo A, Silverman JG, Strathdee SA, Montaner JS, et al.  
601 Early sex work initiation independently elevates odds of HIV infection and police arrest among  
602 adult sex workers in a Canadian setting. *J Acquir Immune Defic Syndr*. 2014;65(1):122-8.
- 603 10. Dellar RC, Dlamini S, Karim QA. Adolescent girls and young women: key populations for  
604 HIV epidemic control. *J Int AIDS Soc*. 2015;18(2 Suppl 1):19408.
- 605 11. King R KF, Bagiire, D, Nakitto M, Mirembe M, Seeley J. PrEP uptake and adherence  
606 among Young Female Sex Workers in Kampala, Uganda in POPPi; a Randomized Controlled  
607 Trial. . INTEREST 2020; Namibia; virtual2020.
- 608 12. Beckham SW, Shembilu CR, Brahmabhatt H, Winch PJ, Beyrer C, Kerrigan DL. Female  
609 sex workers' experiences with intended pregnancy and antenatal care services in southern  
610 Tanzania. *Stud Fam Plann*. 2015;46(1):55-71.
- 611 13. Thomson KA, Hughes J, Baeten JM, John-Stewart G, Celum C, Cohen CR, et al.  
612 Increased Risk of HIV Acquisition Among Women Throughout Pregnancy and During the  
613 Postpartum Period: A Prospective Per-Coital-Act Analysis Among Women With HIV-Infected  
614 Partners. *J Infect Dis*. 2018;218(1):16-25.
- 615 14. Heffron R, Pintye J, Matthews LT, Weber S, Mugo N. PrEP as Peri-conception HIV  
616 Prevention for Women and Men. *Curr HIV/AIDS Rep*. 2016;13(3):131-9.

- 617 15. Saunders B, Sim J, Kingstone T, Baker S, Waterfield J, Bartlam B, et al. Saturation in  
618 qualitative research: exploring its conceptualization and operationalization. *Qual Quant*.  
619 2018;52(4):1893-907.
- 620 16. Gale NK, Heath G, Cameron E, Rashid S, Redwood S. Using the framework method for  
621 the analysis of qualitative data in multi-disciplinary health research. *BMC Med Res Methodol*.  
622 2013;13:117.
- 623 17. Ritchie J SL. Qualitative Data Analysis for Applied Policy Research. In: Huberman A  
624 MM, editor. *The Qualitative Researcher's Companion*: SAGE Publications, Inc.; 2012. p. 305–  
625 29.
- 626 18. Univ. S. Uganda Educational System—overview. 2020 [Available from:  
627 [https://education.stateuniversity.com/pages/1585/Uganda-EDUCATIONAL-SYSTEM-](https://education.stateuniversity.com/pages/1585/Uganda-EDUCATIONAL-SYSTEM-OVERVIEW.html)  
628 [OVERVIEW.html](https://education.stateuniversity.com/pages/1585/Uganda-EDUCATIONAL-SYSTEM-OVERVIEW.html)
- 629 19. Koss CA, Charlebois ED, Ayieko J, Kwarisiima D, Kabami J, Balzer LB, et al. Uptake,  
630 engagement, and adherence to pre-exposure prophylaxis offered after population HIV testing in  
631 rural Kenya and Uganda: 72-week interim analysis of observational data from the SEARCH  
632 study. *Lancet HIV*. 2020;7(4):e249-e61.
- 633 20. Sidebottom D, Ekstrom AM, Stromdahl S. A systematic review of adherence to oral pre-  
634 exposure prophylaxis for HIV - how can we improve uptake and adherence? *BMC Infect Dis*.  
635 2018;18(1):581.
- 636 21. RJ. L. <https://www.avac.org/trial/hptn-083> 2020 [
- 637 22. Joseph Davey DL, Pintye J, Baeten JM, Aldrovandi G, Baggaley R, Bekker LG, et al.  
638 Emerging evidence from a systematic review of safety of pre-exposure prophylaxis for pregnant  
639 and postpartum women: where are we now and where are we heading? *J Int AIDS Soc*.  
640 2020;23(1):e25426.
- 641 23. Glidden DV, Amico KR, Liu AY, Hosek SG, Anderson PL, Buchbinder SP, et al.  
642 Symptoms, Side Effects and Adherence in the iPrEx Open-Label Extension. *Clin Infect Dis*.  
643 2016;62(9):1172-7.
- 644 24. Brooks RA, Cabral A, Nieto O, Fehrenbacher A, Landrian A. Experiences of Pre-  
645 Exposure Prophylaxis Stigma, Social Support, and Information Dissemination Among Black and  
646 Latina Transgender Women Who Are Using Pre-Exposure Prophylaxis. *Transgend Health*.  
647 2019;4(1):188-96.
- 648 25. Mehrotra ML, Rivet Amico K, McMahan V, Glidden DV, Defechereux P, Guanira JV, et  
649 al. The Role of Social Relationships in PrEP Uptake and Use Among Transgender Women and  
650 Men Who Have Sex with Men. *AIDS Behav*. 2018;22(11):3673-80.
- 651 26. Camlin CS, Koss CA, Getahun M, Owino L, Itiakorit H, Akatukwasa C, et al.  
652 Understanding Demand for PrEP and Early Experiences of PrEP Use Among Young Adults in  
653 Rural Kenya and Uganda: A Qualitative Study. *AIDS Behav*. 2020;24(7):2149-62.
- 654 27. Pintye J, Beima-Sofie KM, Makabong OP, Njoroge A, Trinidad SB, Heffron RA, et al.  
655 HIV-Uninfected Kenyan Adolescent and Young Women Share Perspectives on Using Pre-  
656 Exposure Prophylaxis During Pregnancy. *AIDS Patient Care STDS*. 2018;32(12):538-44.
- 657 28. Joseph Davey DL, Bekker LG, Gorbach PM, Coates TJ, Myer L. Delivering preexposure  
658 prophylaxis to pregnant and breastfeeding women in Sub-Saharan Africa: the implementation  
659 science frontier. *AIDS*. 2017;31(16):2193-7.
- 660 29. Macapagal K, Kraus A, Korpak AK, Jozsa K, Moskowitz DA. PrEP Awareness, Uptake,  
661 Barriers, and Correlates Among Adolescents Assigned Male at Birth Who Have Sex with Males  
662 in the U.S. *Arch Sex Behav*. 2020;49(1):113-24.
- 663 30. Syvertsen JL, Robertson Bazzi AM, Scheibe A, Adebajo S, Strathdee SA, Wechsberg  
664 WM. The promise and peril of pre-exposure prophylaxis (PrEP): using social science to inform  
665 prep interventions among female sex workers. *Afr J Reprod Health*. 2014;18(3 Spec No):74-83.  
666
